# Supplementary material
Source: PubMed Central journal article supplement (PMC1964847)

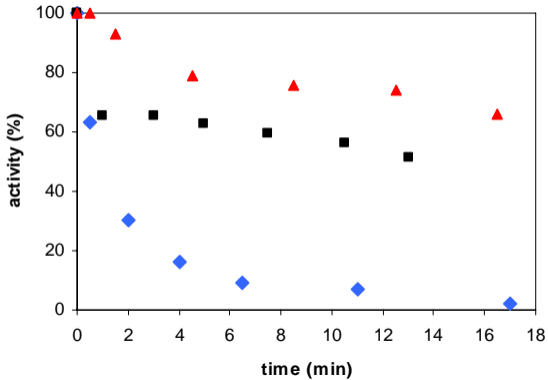

Supplement: pnas_0706803104_1.pdf [file pnas_0706803104_1.pdf]

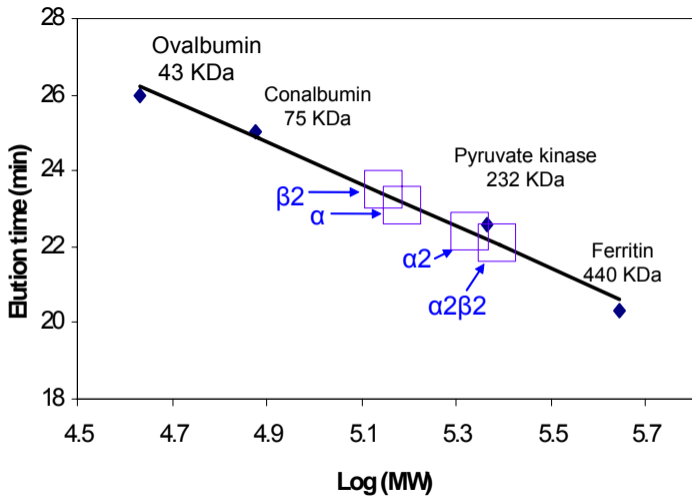

Supplement: pnas_0706803104_2.pdf [file pnas_0706803104_2.pdf]

$\mu\text{M}$     0.2    0.4    0.6    0.8    1    1.2    1.4    1.6

$\alpha$

$\beta$

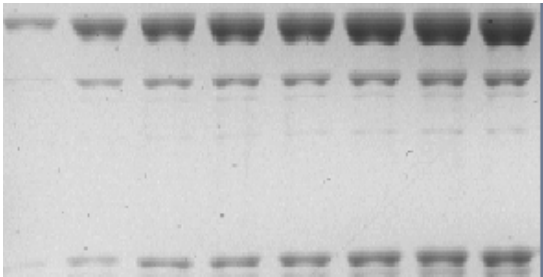

Supplement: pnas_0706803104_3.pdf [file pnas_0706803104_3.pdf]

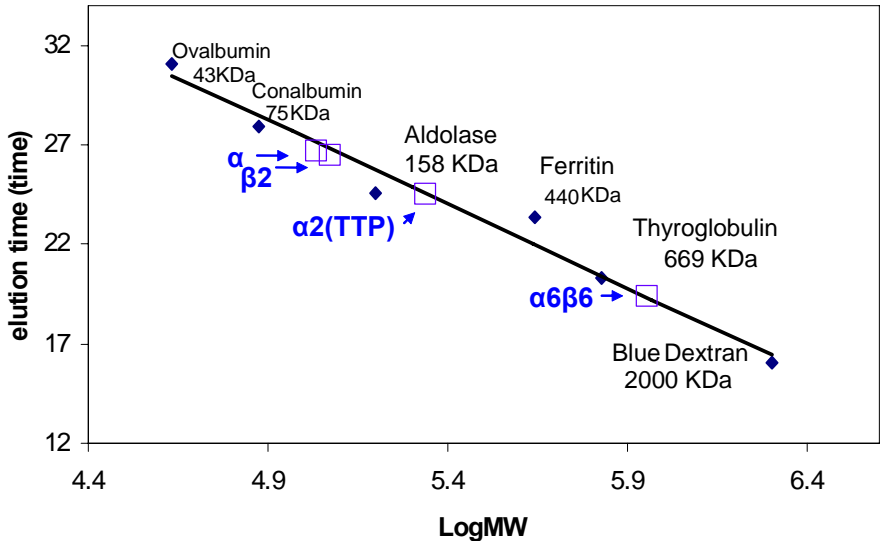

Supplement: pnas_0706803104_4.pdf [file pnas_0706803104_4.pdf]

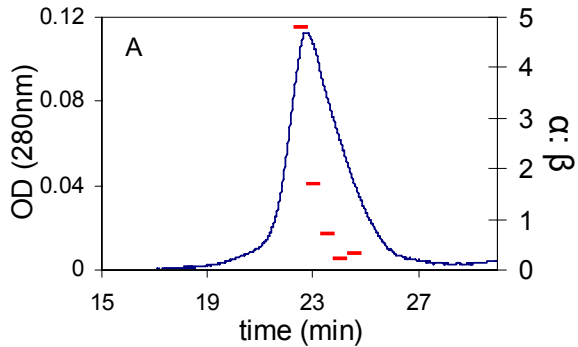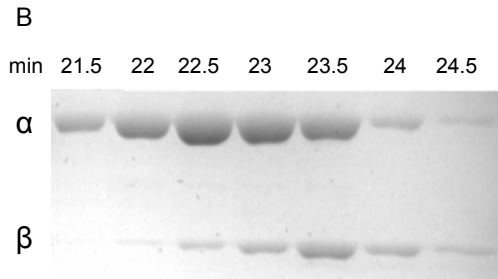

Supplement: pnas_0706803104_5.pdf [file pnas_0706803104_5.pdf]
